# Supplementary material for: 4,4′-Bis(imidazolyl)biphenyl-appended Cd(ii) coordination polymer: a dual-functional material for antibiotic sensing and photodegradation
Source: Royal Society of Chemistry journal article supplement (doi:10.1039/d4ce00294f), 2024-01-01
Supplement: d4ce00294f1.pdf [file d4ce00294f1.pdf]

## 4,4'-bis(imidazolyl)biphenyl appended Cd(II) coordination polymer: A dual functional material for antibiotic sensing and photodegradation

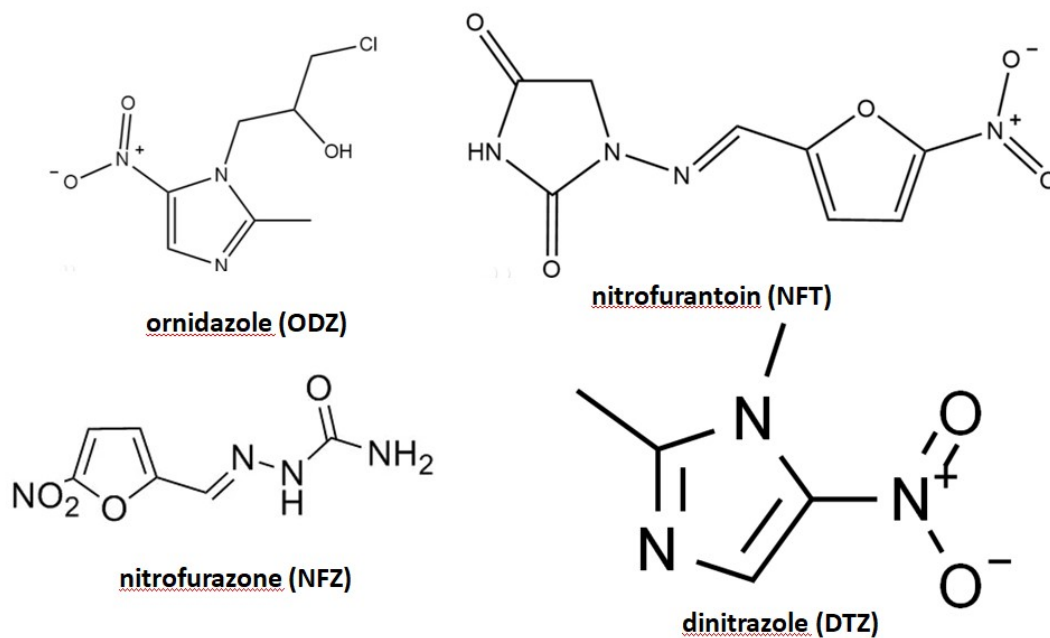

Scheme S1 Chemical structures of antibiotics investigated in this work

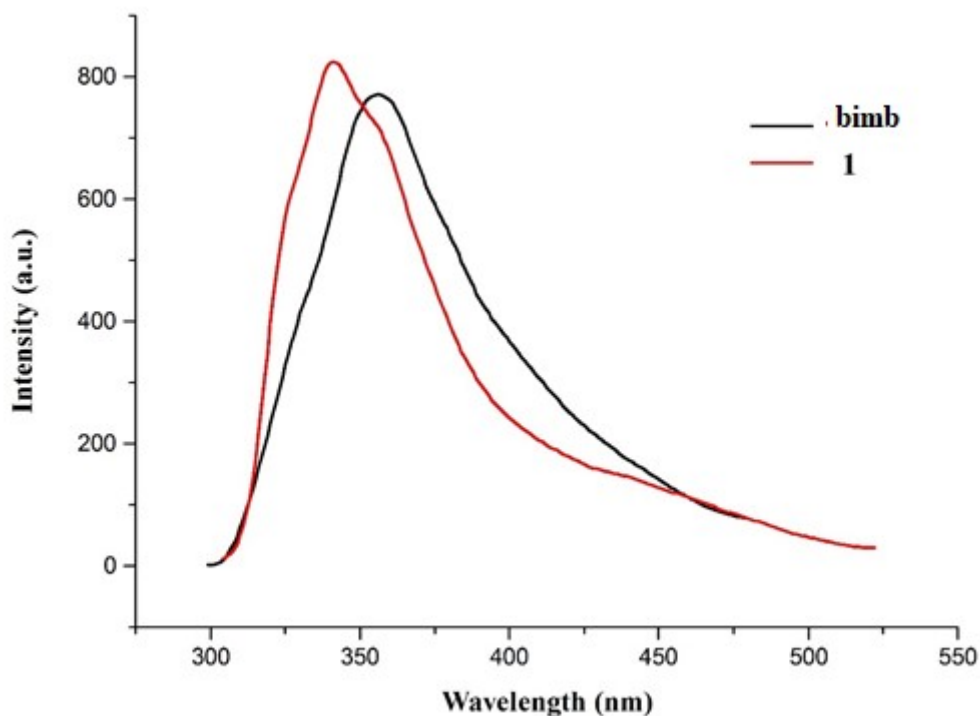

Fig. S1 Photoluminescence spectra for the bimb ligand and 1.

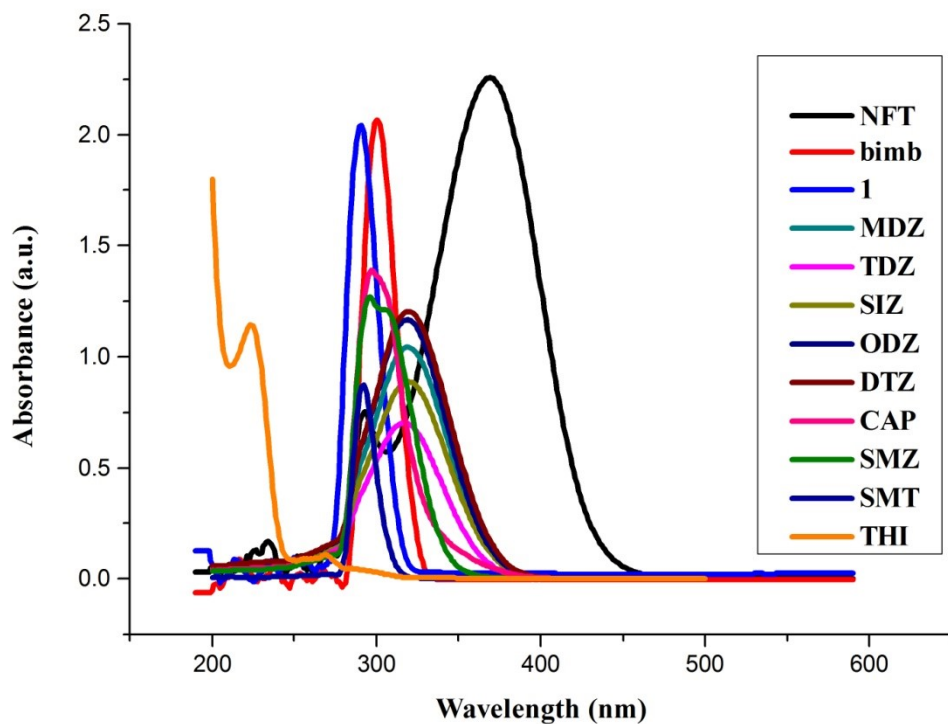

Fig. S2 UV-vis spectra for the bimb ligand, **1** and NFT.

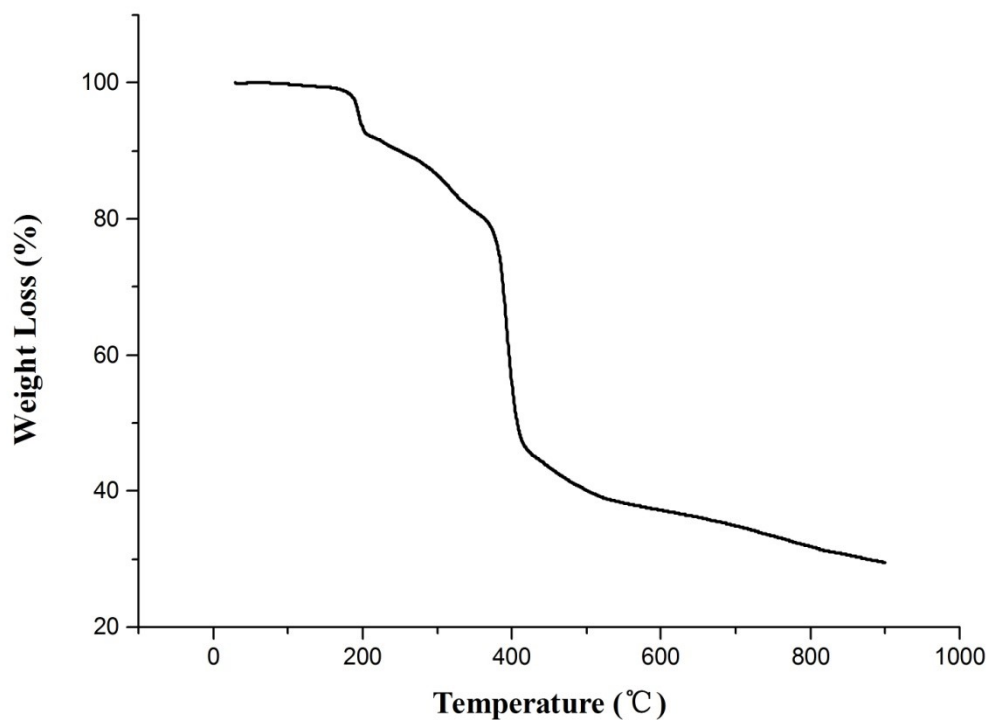

Fig. S3 TGA plot for **1**

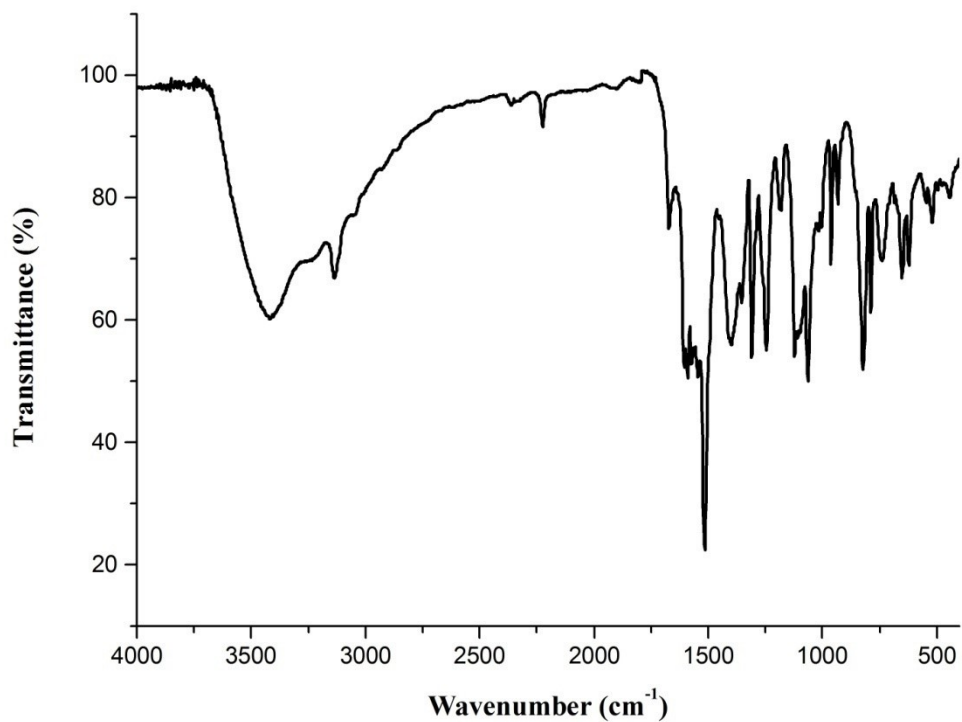

Fig. S4 The FTIR spectra of **1**.

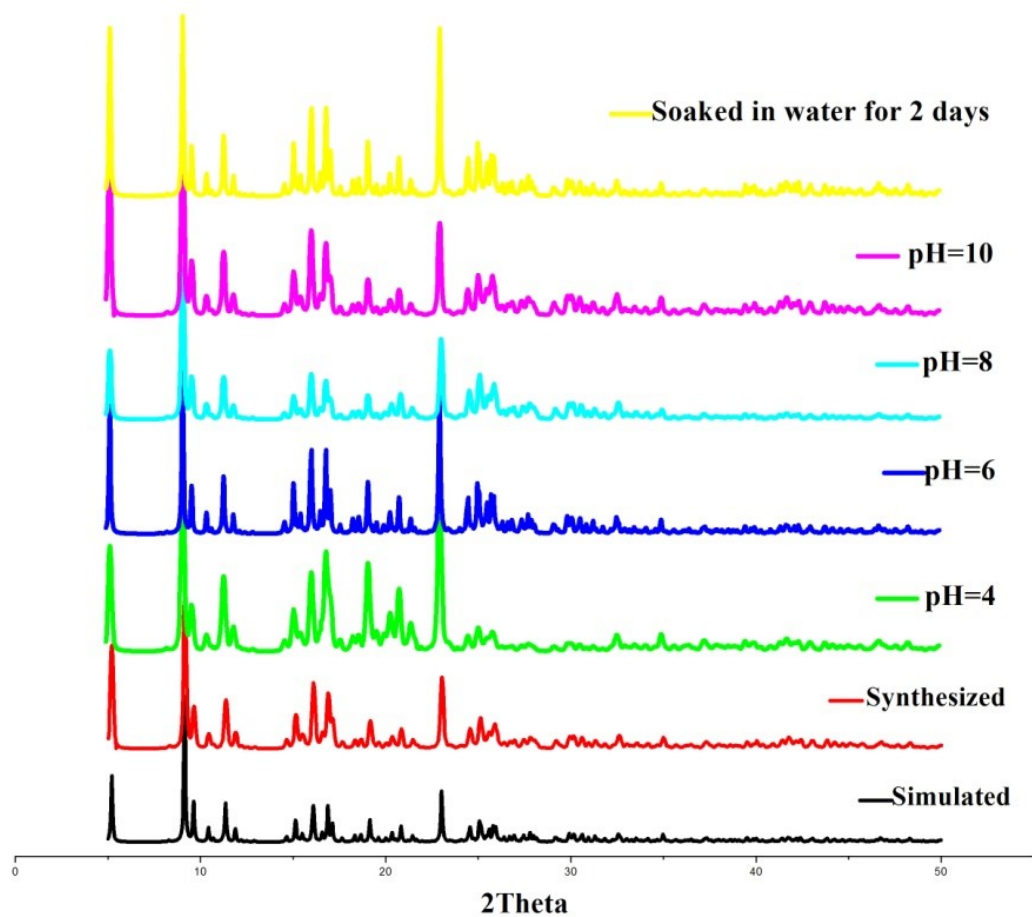

Fig. S5 Simulated and experimental PXRD patterns for **1** at different conditions viz. at different pH and after soaking in aqueous medium for 2 days.

Table S1. Crystal data and structure refinement information for **1**

| Parameter                                                                            | <b>1</b>                                                                                        |
|--------------------------------------------------------------------------------------|-------------------------------------------------------------------------------------------------|
| Formula                                                                              | C <sub>80</sub> H <sub>68</sub> Cd <sub>3</sub> Cl <sub>2</sub> N <sub>16</sub> O <sub>16</sub> |
| Formula weight                                                                       | 1917.63                                                                                         |
| Crystal system                                                                       | monoclinic                                                                                      |
| Space group                                                                          | C2/c                                                                                            |
| Crystal color                                                                        | yellow                                                                                          |
| <i>a</i> , [Å]                                                                       | 34.707(2)                                                                                       |
| <i>b</i> , [Å]                                                                       | 11.0408(7)                                                                                      |
| <i>c</i> , [Å]                                                                       | 21.7951(16)                                                                                     |
| $\alpha$ , [°]                                                                       | 90                                                                                              |
| $\beta$ , [°]                                                                        | 102.2020(10)                                                                                    |
| $\gamma$ , [°]                                                                       | 90                                                                                              |
| <i>V</i> , Å <sup>3</sup>                                                            | 8163.0(10)                                                                                      |
| <i>Z</i>                                                                             | 4                                                                                               |
| $\rho_{\text{calcd}}$ , g/cm <sup>3</sup>                                            | 1.560                                                                                           |
| $\mu$ , mm <sup>-1</sup>                                                             | 0.916                                                                                           |
| <i>F</i> (000)                                                                       | 3864                                                                                            |
| $\theta$ Range, deg                                                                  | 2.46-22.68                                                                                      |
| Reflection collected                                                                 | 9329                                                                                            |
| Goodness-of-fit on <i>F</i> <sup>2</sup>                                             | 1.028                                                                                           |
| <i>R</i> <sub>1</sub> , <i>wR</i> <sub>2</sub> ( <i>I</i> >2 $\sigma$ ( <i>I</i> ))* | 0.0648, 0.1755                                                                                  |
| <i>R</i> <sub>1</sub> , <i>wR</i> <sub>2</sub> (all data)**                          | 0.1231, 0.2210                                                                                  |

$$*R = \sum(F_o - F_c) / \sum(F_o), \quad **wR_2 = \{ \sum [w(F_o^2 - F_c^2)^2] / \sum (F_o^2) \}^{1/2}.$$

Table S2. Selected bond distances (Å) and angles (°) of **1**

|                  |           |                  |            |
|------------------|-----------|------------------|------------|
| Cd(1)-O(1)       | 2.360(6)  | Cd(1)-O(2)       | 2.582(6)   |
| Cd(1)-O(3A)      | 2.567(7)  | Cd(1)-O(4A)      | 2.382(7)   |
| Cd(1)-N(1)       | 2.315(6)  | Cd(1)-N(4B)      | 2.305(5)   |
| Cd(1)-N(5)       | 2.330(6)  | Cd(2)-O(2A)      | 2.319(5)   |
| Cd(2)-O(2)       | 2.319(5)  | Cd(2)-O(3)       | 2.288(5)   |
| Cd(2)-O(3A)      | 2.288(5)  | Cd(2)-N(7A)      | 2.199(3)   |
| Cd(2)-N(7)       | 2.199(3)  |                  |            |
| O(1)-Cd(1)-O(2)  | 51.69(17) | O(1)-Cd(1)-O(3A) | 123.53(18) |
| O(1)-Cd(1)-O(4A) | 170.1(2)  | N(1)-Cd(1)-O(2)  | 88.8(2)    |
| N(1)-Cd(1)-N(4B) | 174.8(2)  | O(1)-Cd(1)-N(5)  | 92.2(2)    |
| O(2)-Cd(2)-O(2A) | 180.0(2)  | O(3)-Cd(2)-O(2A) | 82.0(2)    |
| O(2)-Cd(2)-O(3)  | 98.0(2)   | O(2)-Cd(2)-N(7A) | 92.1(4)    |
| O(3)-Cd(2)-N(7A) | 89.8(5)   | N(7)-Cd(2)-N(7A) | 180.0(5)   |

Symmetry codes: A:0.5-x, 1.5-y, 1-z; B:-0.5+x, 0.5+y, z.
